# Supplementary material
Source: publisher site journal article supplement (https://www.dovepress.com/article/338053)
Supplement: Supplementary file 1 [file get_supplementary_file.php]

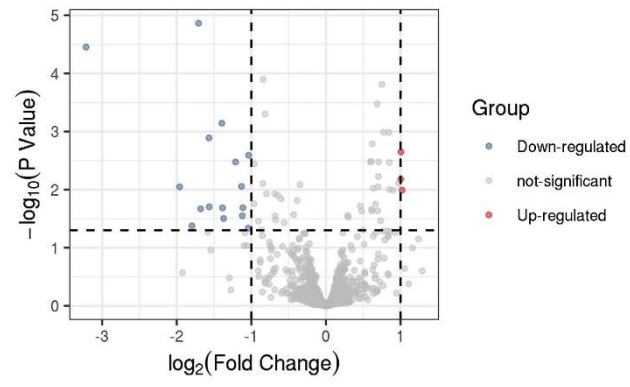

Figure S1. The volcano plot of DE miRNA.

Table S1. Go enrichment terms.

| Category | GO Term    | Description                                           | Count | P.value  |
|----------|------------|-------------------------------------------------------|-------|----------|
| BP       | GO:0009617 | response to bacterium                                 | 16    | 5.23E-10 |
| BP       | GO:0006820 | anion transport                                       | 15    | 7.03E-10 |
| BP       | GO:0015711 | organic anion transport                               | 14    | 2.44E-10 |
| BP       | GO:0046942 | carboxylic acid transport                             | 12    | 5.04E-10 |
| BP       | GO:0015849 | organic acid transport                                | 12    | 5.2E-10  |
| BP       | GO:0098656 | anion transmembrane transport                         | 10    | 2.7E-08  |
| BP       | GO:1905039 | carboxylic acid transmembrane transport               | 8     | 1.29E-08 |
| BP       | GO:1903825 | organic acid transmembrane transport                  | 8     | 1.36E-08 |
| BP       | GO:0034341 | response to interferon-gamma                          | 8     | 1.44E-07 |
| BP       | GO:0007584 | response to nutrient                                  | 8     | 2.68E-07 |
| CC       | GO:0098862 | cluster of actin-based cell projections               | 11    | 1.38E-12 |
| CC       | GO:0031253 | cell projection membrane                              | 11    | 8.97E-09 |
| CC       | GO:0045177 | apical part of cell                                   | 11    | 5.85E-08 |
| CC       | GO:0016324 | apical plasma membrane                                | 10    | 1.11E-07 |
| CC       | GO:0005903 | brush border                                          | 9     | 2.64E-11 |
| CC       | GO:0031526 | brush border membrane                                 | 7     | 3.8E-10  |
| CC       | GO:0030667 | secretory granule membrane                            | 6     | 0.000283 |
| CC       | GO:0045121 | membrane raft                                         | 6     | 0.00043  |
| CC       | GO:0098857 | membrane microdomain                                  | 6     | 0.000437 |
| CC       | GO:0098589 | membrane region                                       | 6     | 0.000535 |
| MF       | GO:0008509 | anion transmembrane transporter activity              | 11    | 5.79E-09 |
| MF       | GO:0022804 | active transmembrane transporter activity             | 11    | 8.71E-09 |
| MF       | GO:0008514 | organic anion transmembrane transporter activity      | 10    | 1.81E-09 |
| MF       | GO:0015291 | secondary active transmembrane transporter activity   | 10    | 1.96E-09 |
| MF       | GO:0046943 | carboxylic acid transmembrane transporter activity    | 9     | 1.26E-09 |
| MF       | GO:0005342 | organic acid transmembrane transporter activity       | 9     | 1.32E-09 |
| MF       | GO:0015293 | symporter activity                                    | 8     | 9.86E-09 |
| MF       | GO:0042379 | chemokine receptor binding                            | 5     | 1.99E-06 |
| MF       | GO:0045236 | CXCR chemokine receptor binding                       | 4     | 2.03E-07 |
| MF       | GO:0015175 | neutral amino acid transmembrane transporter activity | 4     | 2.97E-06 |

Table S2. qRT-PCR results of mmu-mir-429-3p.

| Sample | mmu-mir-429-3p |
|--------|----------------|
| CD     | 1.011322       |
| CD     | 0.926412       |
| CD     | 1.158746       |
| CD     | 1.358521       |
| CD     | 1.065476       |
| CD     | 0.812698       |
| CD     | 1.281157       |
| CD     | 1.168716       |
| CD     | 1.258985       |
| CD     | 1.029942       |
| N      | 3.608006       |
| N      | 2.751811       |
| N      | 4.35258        |
| N      | 3.125675       |
| N      | 2.924217       |
| N      | 3.561489       |
| N      | 4.088649       |
| N      | 3.343249       |
| N      | 4.452489       |
| N      | 3.751452       |

Table S3. qRT-PCR results of PTGS2.

| Sample | PTGS2       |
|--------|-------------|
| CD     | 39.49113525 |
| CD     | 42.14122784 |
| CD     | 37.51276914 |
| CD     | 38.15186518 |
| CD     | 42.95114746 |
| CD     | 38.47126796 |
| CD     | 35.79617861 |
| CD     | 37.15972238 |
| CD     | 36.99123658 |
| CD     | 39.48722482 |
| N      | 17.73539739 |
| N      | 17.79999674 |
| N      | 10.21574802 |
| N      | 12.52272219 |
| N      | 15.51254522 |
| N      | 16.15521893 |
| N      | 13.41256874 |
| N      | 11.55128513 |
| N      | 13.84229218 |
| N      | 16.68430149 |
